# Supplementary material for: Thermally Activated and Aggregation‐Regulated Excitonic Coupling Enable Emissive High‐Lying Triplet Excitons
Source: PubMed Central journal article supplement (PMC9545188; doi:10.1002/anie.202206681), 2022-07-04
Supplement: ANIE-61-0-s001.pdf [file ANIE-61-0-s001.pdf]

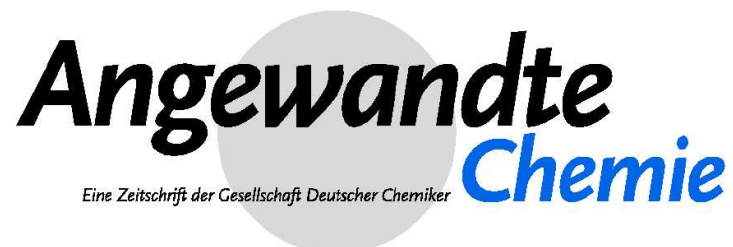

## Supporting Information

### **Thermally Activated and Aggregation-Regulated Excitonic Coupling Enable Emissive High-Lying Triplet Excitons**

*T. Wang, J. De, S. Wu, A. K. Gupta, E. Zysman-Colman\**

## Table of Contents

|                                   |            |
|-----------------------------------|------------|
| <b>General methods .....</b>      | <b>S3</b>  |
| <b>Experimental section .....</b> | <b>S7</b>  |
| <b>Photophysical data.....</b>    | <b>S17</b> |
| <b>References .....</b>           | <b>S26</b> |

## General Methods

### *General Synthetic Procedures*

10*H*-phenothiazine 5,5-dioxide was synthesized according to a literature procedure.<sup>1</sup> All other reagents and solvents were obtained from commercial sources and used as received. Air-sensitive reactions were performed under a nitrogen atmosphere using Schlenk techniques, and no special precautions were taken to exclude air or moisture during work-up. Flash column chromatography was carried out using silica gel (Silica-P from Silicycle, 60 Å, 40-63 μm). Analytical thin-layer-chromatography (TLC) was performed with silica plates with aluminum backings (250 μm with F-254 indicator). TLC visualization was accomplished by a 254/365 nm UV lamp. <sup>1</sup>H and <sup>13</sup>C NMR spectra were recorded on a Bruker Advance spectrometer (500 MHz for <sup>1</sup>H, 125 MHz for <sup>13</sup>C) in *d*<sub>6</sub>-DMSO and CDCl<sub>3</sub>. The following abbreviations have been used for multiplicity assignments: “s” for singlet, “d” for doublet, “t” for triplet, “q” for quartet, “m” for multiplet. <sup>1</sup>H and <sup>13</sup>C NMR spectra were referenced residual solvent peaks with respect to TMS (δ = 0 ppm). Melting points were measured using open-ended capillaries on an Electrothermal 1101D Mel-Temp apparatus and are uncorrected. High-resolution mass spectrometry (HRMS) was performed at the University of Edinburgh. Elemental analyses were performed by the School of Geosciences at the University of Edinburgh.

### *Electrochemistry measurements*

Cyclic Voltammetry (CV) analysis was performed on an Electrochemical Analyzer potentiostat model 620E from CH Instruments at a sweep rate of 100 mV/s. Differential pulse voltammetry (DPV) was conducted with an increment potential of 0.01 V and a pulse amplitude, width, and period of 50 mV, 0.06, and 0.5 s, respectively. Samples (**PXZ-Nap** and **PTZ-Nap**) were prepared as *N,N*-dimethylformamide solutions, degassed by sparging with DMF-saturated N<sub>2</sub> for 5 minutes before measurements. All measurements were performed using 0.1 M DMF solution of tetra-*n*-butylammonium

hexafluorophosphate ( $[n\text{Bu}_4\text{N}]\text{PF}_6$ ). An  $\text{Ag}/\text{Ag}^+$  electrode was used as the reference electrode, while a glassy carbon electrode and a platinum wire were used as the working electrode and counter electrode, respectively. The redox potentials are reported relative to a saturated calomel electrode (SCE) with a ferrocenium/ferrocene ( $\text{Fc}/\text{Fc}^+$ ) redox couple as the internal standard (0.45 V vs. SCE).<sup>2</sup> The HOMO and LUMO energies were determined using the relation  $E_{\text{HOMO/LUMO}} = -(E_{\text{ox}} / E_{\text{red}} + 4.8)$  eV, where  $E_{\text{ox}}$  and  $E_{\text{red}}$  are the onset of anodic and cathodic peak potentials, respectively calculated from DPV relative to  $\text{Fc}/\text{Fc}^+$ .<sup>3</sup>

### ***Theoretical calculations***

All ground state optimizations have been carried out at the Density Functional Theory (DFT) level with Gaussian 16<sup>4</sup> using the PBE0 functional<sup>5</sup> and the 6-31G(d,p) basis set.<sup>6</sup> Vibrational frequency calculations were performed to ensure that the optimized geometries represented the local minima. Excited-state calculations have been performed at time-dependent DFT (TD-DFT) using the same functional and basis set as for ground state geometry optimization. Spin-orbit coupling matrix elements ( $\xi$ ) were calculated based on the optimized singlet excited state geometry. Triplet excited state optimizations were conducted at the uPBE0/6-31G(d,p) level. Potential surface energy scan was conducted using optimized triple excited-state geometry. Molecular orbitals were visualized using GaussView 6.0.<sup>7</sup> Spin-orbit coupling matrix elements between singlet and triplet excited states were calculated using the PySOC program.<sup>8</sup>

### ***Photophysical measurements***

Optically dilute solutions of concentrations on the order of  $10^{-5}$  or  $10^{-6}$  M were prepared in spectroscopic or HPLC grade solvents for absorption and emission analysis. Absorption spectra were recorded at room temperature on a Shimadzu UV-2600 double beam spectrophotometer with a 1 cm quartz cuvette. Molar absorptivity determination was verified by linear regression analysis of values obtained from at least four independent solutions at varying concentrations with absorbance ranging from  $3.27 \times 10^{-6}$  to  $2.12 \times 10^{-5}$  M.

For emission investigations, degassed solutions were prepared via three freeze-pump-thaw cycles, and spectra were taken using homemade Schlenk quartz cuvette. Steady-state and time-resolved emission spectra were recorded at 298 K using an Edinburgh Instruments F980. Samples were excited at 370 nm for steady-state measurements and at 379 nm (picosecond laser) for time-resolved measurements. Phosphorescence emission spectra were collected with a 379 nm picosecond laser by the multi-channel scaling (MCS) mode.

Photoluminescence quantum yields for solutions were determined using the optically dilute method<sup>9</sup> in which four sample solutions with absorbances of ca. 0.10, 0.075, 0.050 and 0.025 at 360 nm were used. The Beer-Lambert law was found to remain linear at the concentrations of the solutions. For each sample, linearity between absorption and emission intensity was verified through linear regression analysis with the Pearson regression factor ( $R^2$ ) for the linear fit of the data set surpassing 0.9. Individual relative quantum yield values were calculated for each solution and the values reported represent the slope obtained from the linear fit of these results. The quantum yield of the sample,  $\Phi_{PL}$ , can be determined by the equation  $\Phi_{PL} = (\Phi_r * \frac{A_r}{A_s} * \frac{I_s}{I_r} * \frac{n_s^2}{n_r^2})$ ,<sup>9</sup> where A stands for the absorbance at the excitation wavelength ( $\lambda_{exc}$ : 370 nm), I is the integrated area under the corrected emission curve and n is the refractive index of the solvent with the subscripts “s” and “r” representing sample and reference respectively.  $\Phi_r$  is the absolute quantum yield of the external reference quinine sulfate ( $\Phi_r = 54.6\%$  in 1 N H<sub>2</sub>SO<sub>4</sub>),<sup>10</sup> The experimental uncertainty in the emission quantum yields is conservatively estimated to be 10%, though we have found that statistically we can reproduce  $\Phi_{PLS}$  to 3% relative error. An integrating sphere (Hamamatsu, C9920-02) was employed for the photoluminescence quantum yield measurements of thin film samples. The  $\Phi_{PL}$  of the films were then measured in air and N<sub>2</sub> environment by purging the integrating sphere with N<sub>2</sub> gas flow.

The singlet-triplet energy splitting ( $\Delta E_{ST}$ ) in 2-MeTHF was estimated by recording the prompt fluorescence spectra and phosphorescence emission at 77 K. The films were excited by a femtosecond laser emitting at 343 nm (Orpheus-N, model: SP-06-200-PP).

Emission from the samples was focused onto a spectrograph (Chromex imaging, 250is spectrograph) and detected on a sensitive gated iCCD camera (Stanford Computer Optics, 4Picos) having subnanosecond resolution. Phosphorescence spectra were measured from 1 ms after photoexcitation, with an iCCD exposure time was 7.5 ms. Prompt fluorescence spectra were measured from 1 ns after photoexcitation with an iCCD exposure time was 99 ns.

### ***Fitting of time-resolved luminescence measurements***

Time-resolved PL measurements were fitted to a sum of exponential decay model, with chi-squared ( $\chi^2$ ) values between 1 and 2, using the EI FLS980 software. Each component of the decay is assigned a weight, ( $w_i$ ), which is the contribution of the emission from each component to the total emission.

The average lifetime was then calculated using the following:

- Two exponential decay model:

$$\tau_{AVG} = \tau_1 w_1 + \tau_2 w_2$$

with weights defined as  $w_1 = \frac{A_1 \tau_1}{A_1 \tau_1 + A_2 \tau_2}$  and  $w_2 = \frac{A_2 \tau_2}{A_1 \tau_1 + A_2 \tau_2}$  where  $A_1$  and  $A_2$  are the preexponential-factors of each component.

- Three exponential decay model:

$$\tau_{AVG} = \tau_1 w_1 + \tau_2 w_2 + \tau_3 w_3$$

with weights defined as  $w_1 = \frac{A_1 \tau_1}{A_1 \tau_1 + A_2 \tau_2 + A_3 \tau_3}$ ,  $w_2 = \frac{A_2 \tau_2}{A_1 \tau_1 + A_2 \tau_2 + A_3 \tau_3}$  and  $w_3 = \frac{A_3 \tau_3}{A_1 \tau_1 + A_2 \tau_2 + A_3 \tau_3}$  where  $A_1$ ,  $A_2$  and  $A_3$  are the preexponential-factors of each component.

## Experimental Section

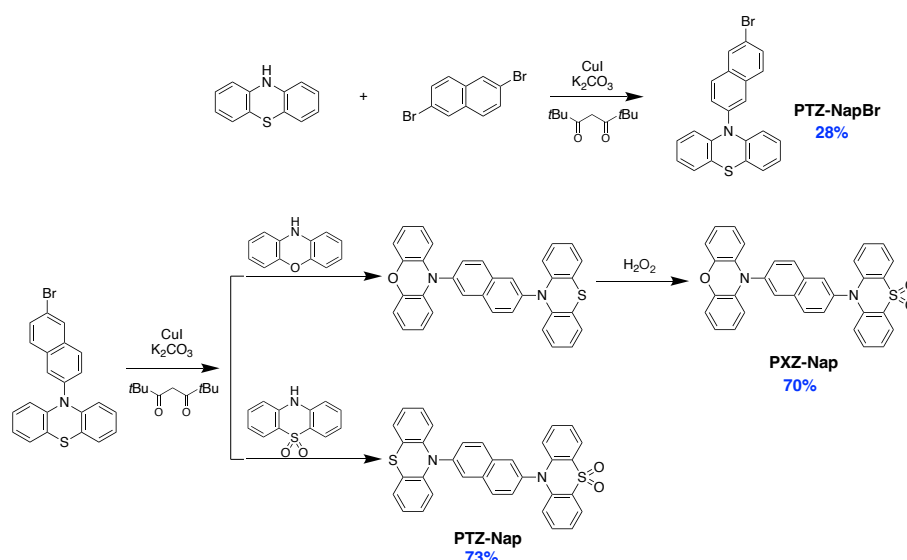

**Scheme S1.** Synthetic Routes and chemical structures of **PTZ-NapBr**, **PXZ-Nap**, and **PTZ-Nap**

### Synthesis of 10-(6-bromonaphthalen-2-yl)-10H-phenothiazine (**PTZ-NapBr**)

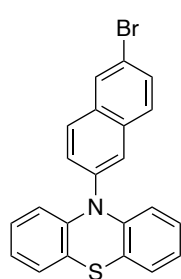

Phenothiazine (2.00 g, 10.0 mmol, 1.0 equiv.), 2,6-dibromonaphthalene (4.30 g, 15.0 mmol, 1.5 equiv.), potassium carbonate (2.76 g, 20.0 mmol, 2 equiv.), copper iodide (0.19 g, 1.0 mmol, 0.1 equiv.), and 2,2,6,6-tetramethylheptane-3,5-dione (0.37 g, 2.0 mmol, 0.2 equiv.) were added to a Schlenk flask containing 50 mL of anhydrous DMF. After degassing the flask, the system was placed under a nitrogen atmosphere. The reaction mixture was heated at 150 °C for 36 h. After cooling to room temperature, DCM (200 mL) was added to the mixture. The mixture was washed with a saturated NaCl aqueous solution (200 mL) and further with a 1 M HCl solution (2 × 200 mL). The collected organic phase was dried over anhydrous sodium sulfate and concentrated under reduced pressure. The crude mixture was purified by

silica gel column chromatography (DCM: Hexane = 1:4,  $R_f$ : 0.23) to afford the desired compound as a white solid. **Yield:** 1.14 g, 28%. **Mp:** 168-169 °C.  **$^1\text{H}$  NMR (500 MHz,  $d_6$ -DMSO)  $\delta$  (ppm):** 8.38 (d,  $J$  = 2.1 Hz, 1H), 8.20 (d,  $J$  = 8.7 Hz, 1H), 8.09 (d,  $J$  = 2.1 Hz, 1H), 8.00 (d,  $J$  = 8.8 Hz, 1H), 7.73 (dd,  $J$  = 8.7, 2.0 Hz, 1H), 7.60 (dd,  $J$  = 8.7, 2.1 Hz, 1H), 7.18 – 7.11 (m, 2H), 6.97 – 6.87 (m, 4H), 6.28 – 6.20 (m, 2H).  **$^{13}\text{C}$  NMR (125 MHz,  $d_6$ -DMSO)  $\delta$  (ppm):** 143.94, 138.93, 133.86, 133.47, 130.68, 130.57, 130.19, 130.13, 129.67, 128.83, 127.87, 127.27, 123.46, 120.56, 120.38, 117.07. GC-MS ( $m/z$ ): 403.05. The characterization matches the reported results.<sup>11</sup>

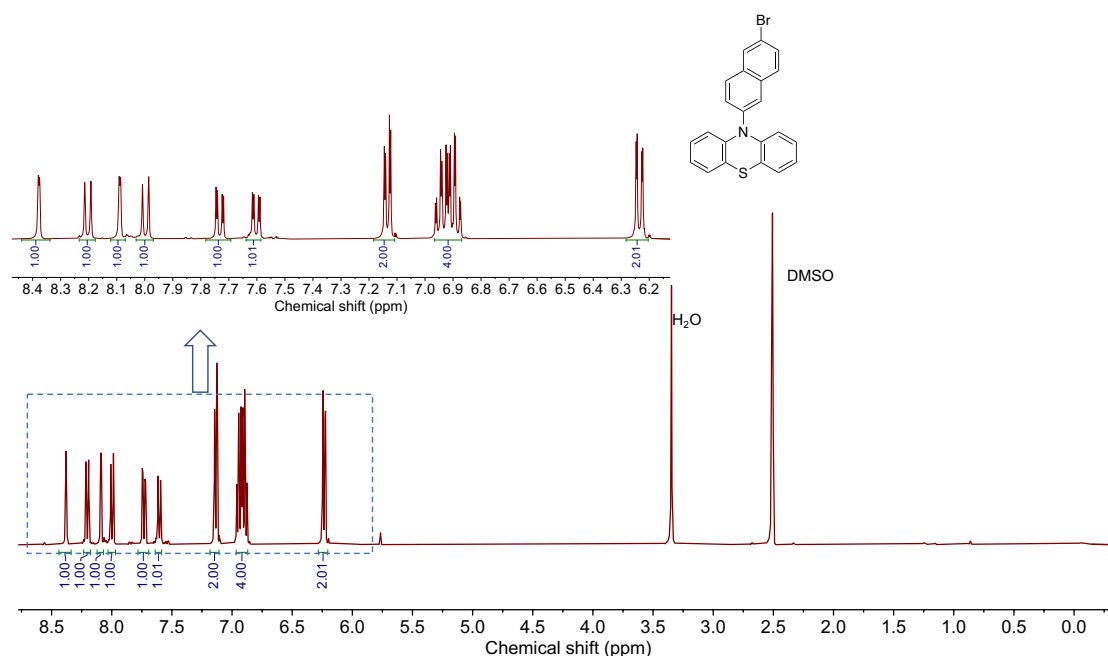

**Figure S1.**  $^1\text{H}$  NMR spectrum of PTZ-NapBr in  $d_6$ -DMSO.



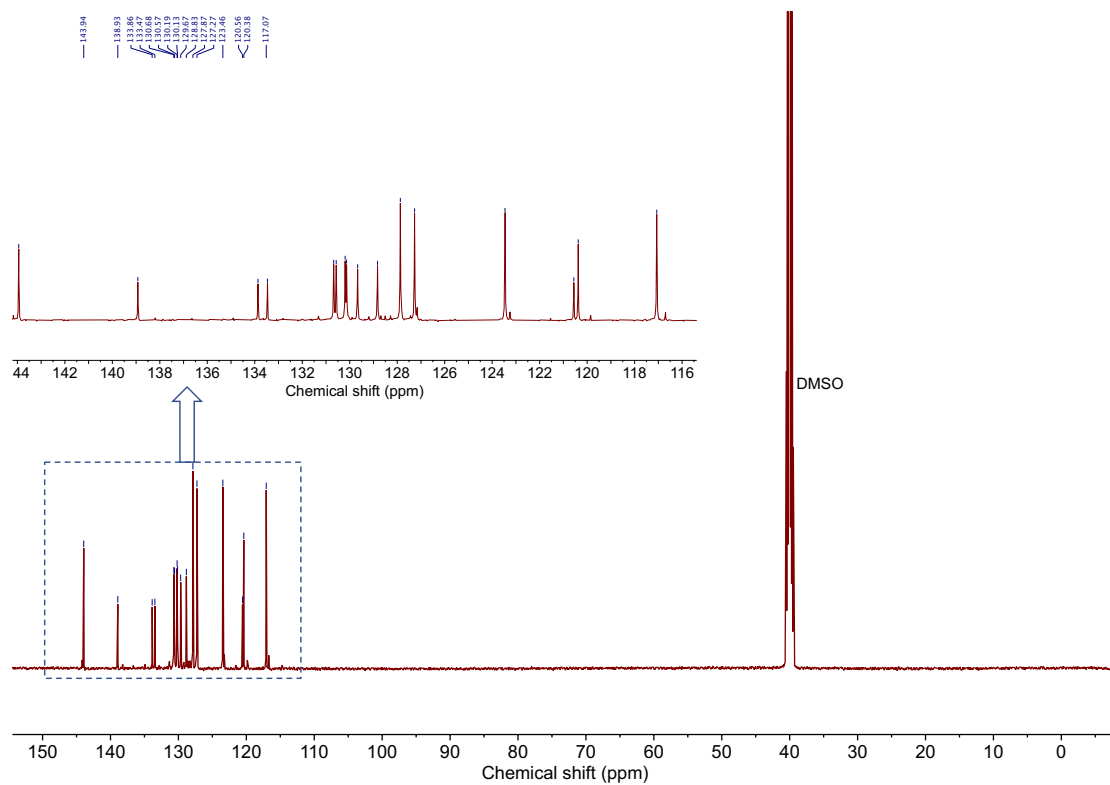

**Figure S2.**  $^{13}\text{C}$  NMR spectrum of **PTZ-NapBr** in  $d_6$ -DMSO.

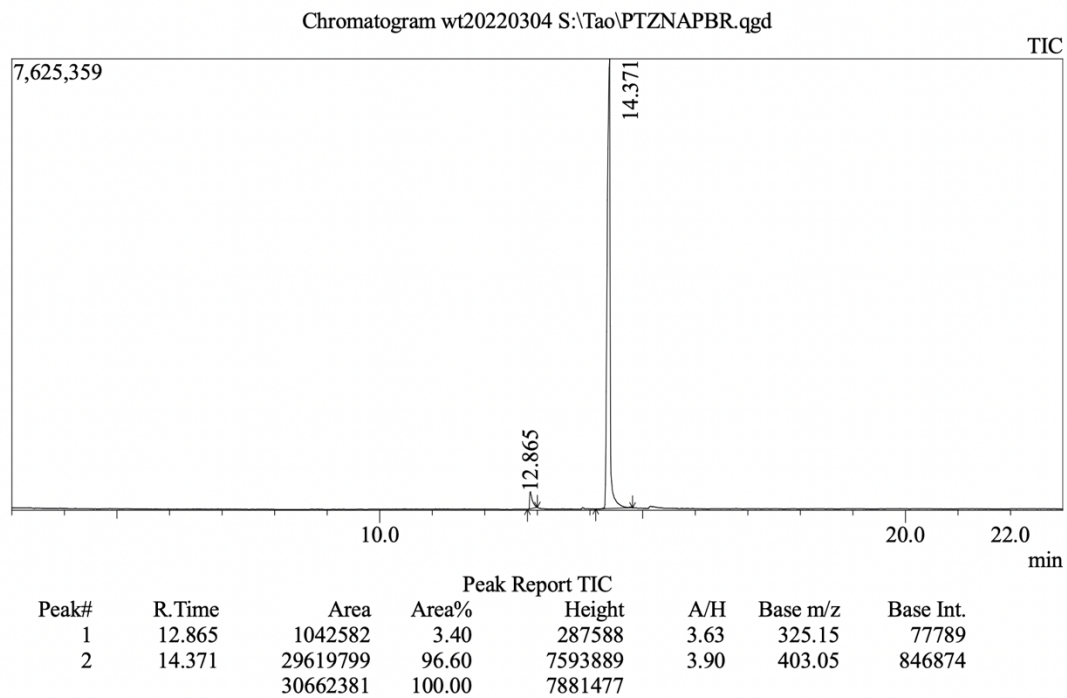

**Figure S3.** GC-MS trace of **PTZ-NapBr**.

## Synthesis of 10-(6-(10*H*-phenoxazin-10-yl)naphthalen-2-yl)-10*H*-phenothiazine 5,5-dioxide (PXZ-Nap)

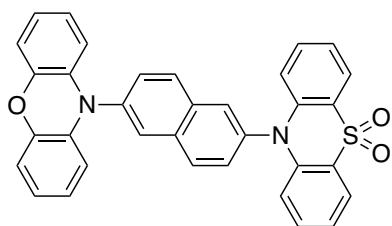

Phenoxazine (0.41 g, 2.23 mmol, 1.5 equiv.), **PTZ-NapBr** (0.60 g, 1.45 mmol, 1.0 equiv.), potassium carbonate (0.41 g, 2.97 mmol, 2.0 equiv.), copper iodide (0.029 g, 0.15 mmol, 0.1 equiv.), and 2,2,6,6-tetramethylheptane-3,5-dione (0.055 g, 0.30 mmol, 0.2 equiv.) were added to a Schlenk flask containing 6 mL of anhydrous DMF. After degassing the flask, the system was placed under a nitrogen atmosphere. The reaction mixture was heated at 150 °C for 36 h. After cooling to room temperature, DCM (100 mL) was added to the mixture. The mixture was washed with a saturated NaCl aqueous solution (100 mL) and further with a 1M HCl solution (2 × 100 mL). The collected organic phase was dried over anhydrous sodium sulfate and concentrated under reduced pressure. The crude mixture was dissolved in acetic acid (8 mL) and 30% hydrogen peroxide (1 mL) was added. The mixture system was heated at 120 °C 10 hours. After cooling, 40 mL H<sub>2</sub>O was added to the system. The collected precipitates were purified by silica gel column chromatography (EtOAc: Hexane = 1:2, *R<sub>f</sub>*: 0.26) to afford the desired compound as a light-yellow solid. **Yield:** 0.54 g, 70%. **Mp:** >390 °C. **<sup>1</sup>H NMR (500 MHz, *d*<sub>6</sub>-DMSO) δ (ppm):** 8.45 – 8.32 (m, 4H), 8.14 (dd, *J* = 7.9, 1.6 Hz, 2H), 7.68 (ddd, *J* = 18.5, 8.6, 2.1 Hz, 2H), 7.58 (ddd, *J* = 8.8, 7.2, 1.6 Hz, 2H), 7.39 (ddd, *J* = 8.0, 7.1, 1.0 Hz, 2H), 6.81 (dd, *J* = 7.7, 1.7 Hz, 2H), 6.75 – 6.68 (m, 6H), 6.00 (dd, *J* = 7.7, 1.7 Hz, 2H). **<sup>13</sup>C NMR (125 MHz, *d*<sub>6</sub>-DMSO) δ (ppm):** 143.66, 140.71, 137.73, 137.09, 134.98, 134.39, 134.24, 134.05, 132.60, 132.28, 130.50, 130.00, 129.43, 128.64, 124.28, 123.32, 122.92, 122.56, 122.22, 118.01, 115.93, 113.97. **HR-MS [M+H]<sup>+</sup> Calculated:** (C<sub>34</sub>H<sub>22</sub>N<sub>2</sub>O<sub>3</sub>S) 539.1424; **Found:** 539.1401. **Anal. Calcd. for C<sub>34</sub>H<sub>22</sub>N<sub>2</sub>O<sub>3</sub>S:** C, 75.82%; H, 4.12%; N, 5.20%. **Found:** C, 76.45%; H, 4.03%; N, 4.92%. Purity: 99.90% (HPLC analysis; retention time: 6.95 minutes in 75% MeCN/25% H<sub>2</sub>O).

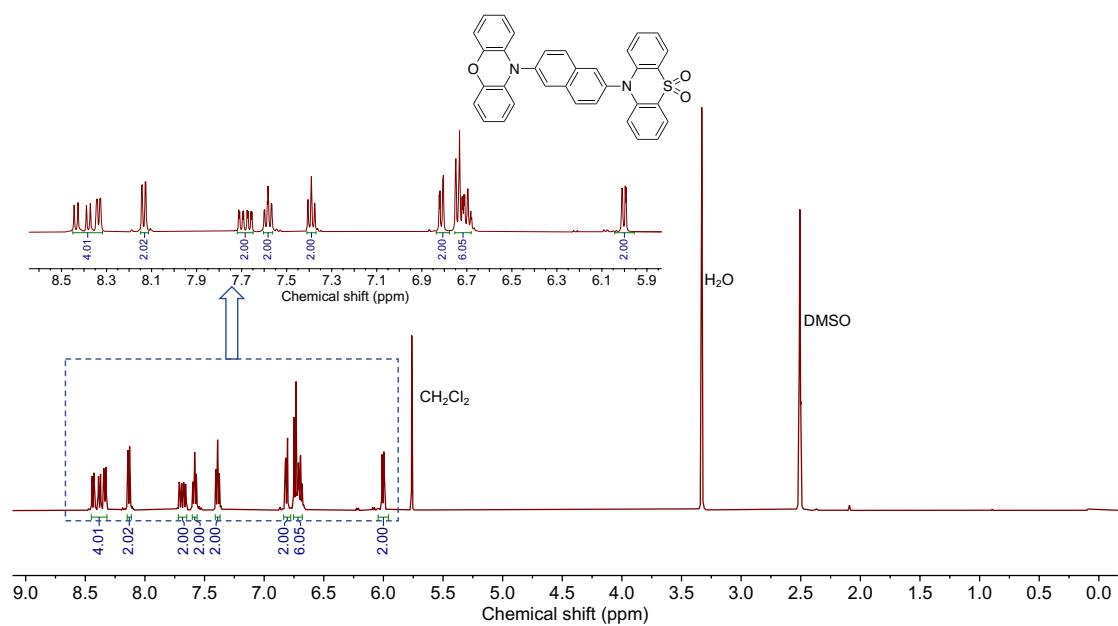

**Figure S4.**  $^1\text{H}$  NMR spectrum of PXZ-Nap in  $d_6$ -DMSO.

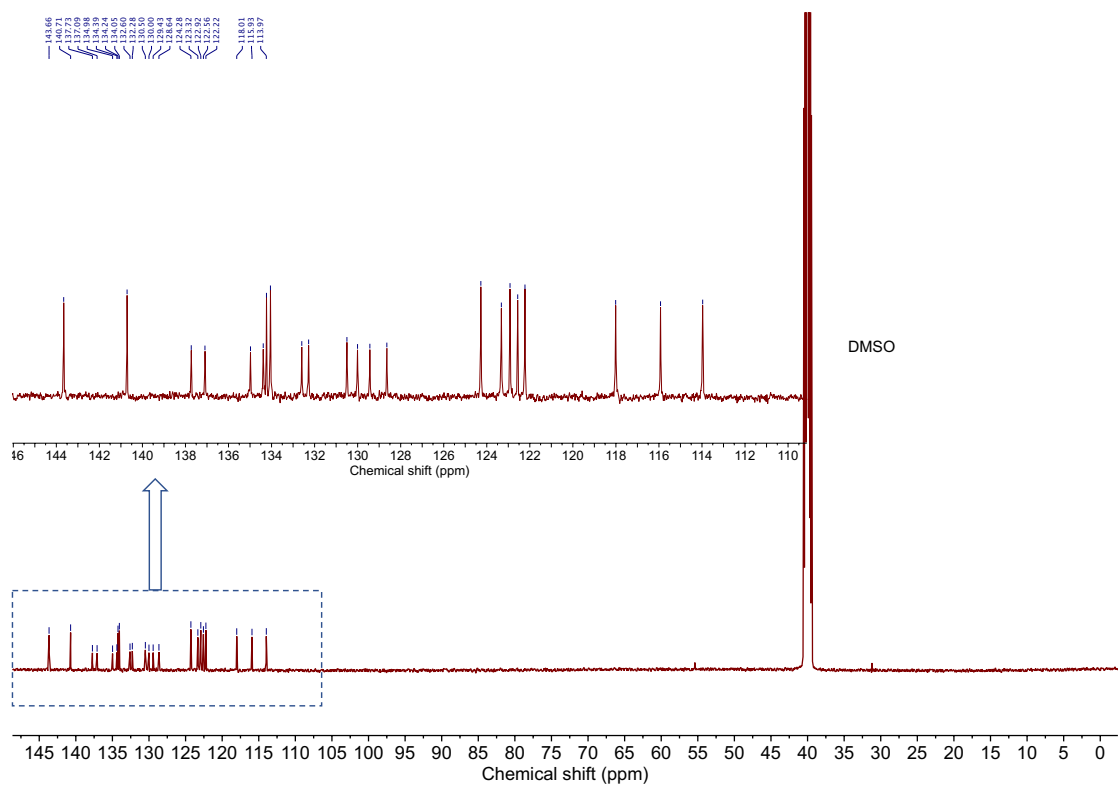

**Figure S5.**  $^{13}\text{C}$  NMR spectrum of PXZ-Nap in  $d_6$ -DMSO.

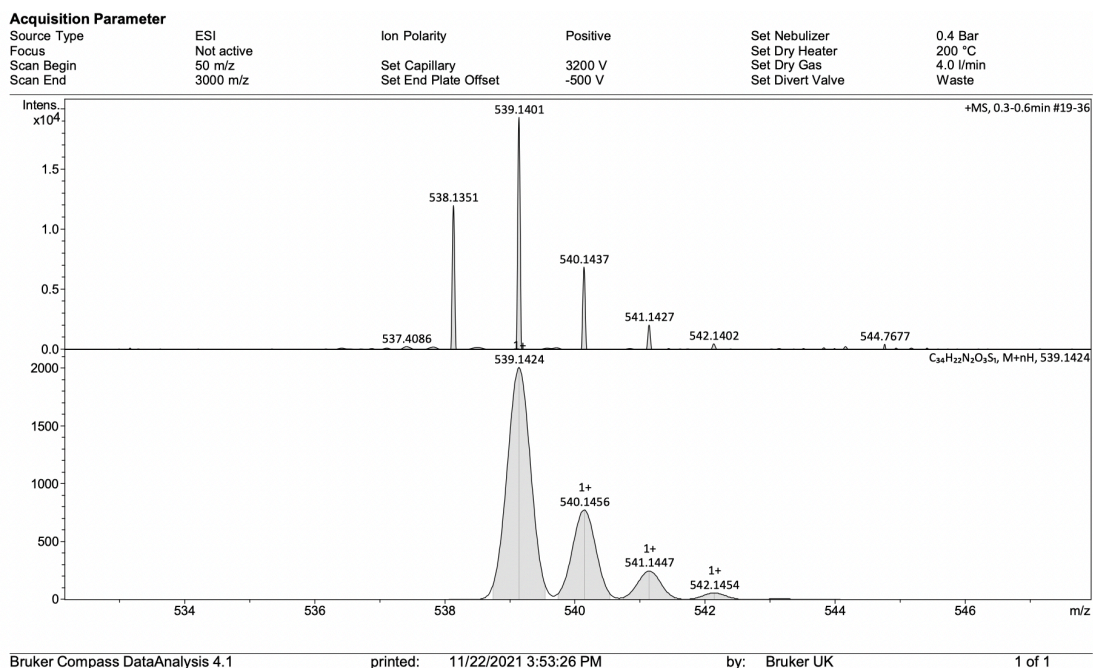

**Figure S6.** HRMS spectrum of PXZ-Nap.

**Analysis type:**

Single  Duplicate  Triplicate

**Analysis Result:**

| Element  | Expected % | Found (1) | Found (2) | Found (3) |
|----------|------------|-----------|-----------|-----------|
| Carbon   | 75.82      | 76.45     | 75.02     |           |
| Hydrogen | 4.12       | 4.03      | 4.11      |           |
| Nitrogen | 5.20       | 4.92      | 4.85      |           |
| Oxygen   |            |           |           |           |

**Authorising Signature:**

|                |          |
|----------------|----------|
| Date completed | 15.12.21 |
| Signature      | J-PC     |
| comments       |          |

**Figure S7.** Elemental analysis result of PXZ-Nap.

# HPLC Trace Report 14 Feb 2022

## <Sample Information>

Sample Name : PXZ-Nap  
Sample ID :  
Method Filename : 75% Acetonitrile 25 Water 20 mins.lcm  
Batch Filename : PhT-Nap method.lcb  
Vial # : 2-48  
Injection Volume : 10 uL  
Date Acquired : 14/02/2022 19:44:16  
Date Processed : 14/02/2022 20:04:19  
Sample Type : Unknown  
Acquired by : System Administrator  
Processed by : System Administrator

## <Chromatogram>

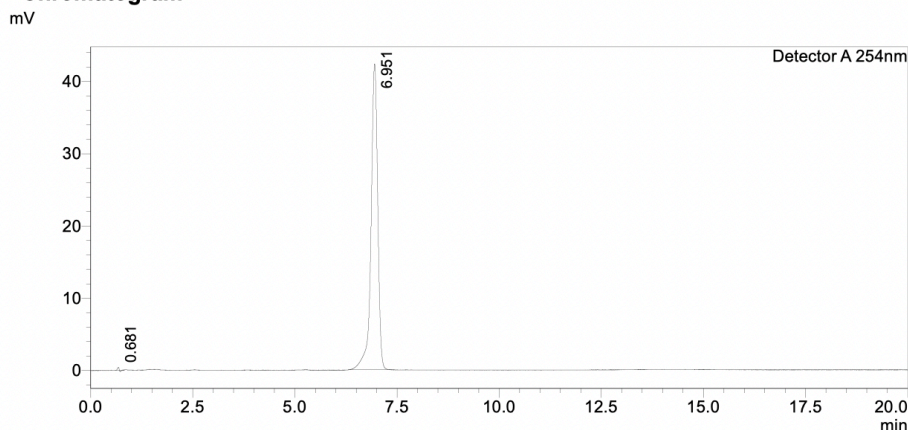

## <Peak Table>

| Peak# | Ret. Time | Area   | Height | Area%   | Area/Height | Width at 5% Height |
|-------|-----------|--------|--------|---------|-------------|--------------------|
| 1     | 0.681     | 486    | 395    | 0.100   | 1.228       | 0.064              |
| 2     | 6.951     | 486058 | 42258  | 99.900  | 11.502      | 0.444              |
| Total |           | 486544 | 42653  | 100.000 |             |                    |

**Figure S8.** HPLC trace of **PXZ-Nap**. Note: at the retention time of 0.68 min, the peak is the background signal from the elution system because the sample signal is not enough strong caused by the solubility.

## Synthesis of 10-(6-(10*H*-phenothiazin-10-yl)naphthalen-2-yl)-10*H*-phenothiazine 5,5-dioxide (PTZ-Nap)

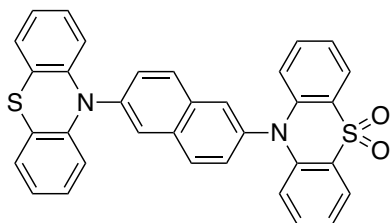

10*H*-phenothiazine 5,5-dioxide (0.43 g, 1.85 mmol, 1.5 equiv.), **PTZ-NapBr** (0.50 g, 1.24 mmol, 1.0 equiv.), potassium carbonate (0.41 g, 2.47 mmol, 2.0 equiv.), copper iodide (0.041 g, 0.12 mmol, 0.1 equiv.), and 2,2,6,6-tetramethylheptane-3,5-dione (0.055 g, 0.24 mmol, 0.2 equiv.) were added to a Schlenk flask containing 6 mL of anhydrous DMF. After degassing the flask, the system was placed under a nitrogen atmosphere. The reaction mixture was heated at 150 °C for 36 h. After cooling to room

temperature, DCM (100 mL) was added to the mixture. The mixture was washed with a saturated NaCl aqueous solution (100 mL) and further with a 1M HCl solution (2 × 100 mL). The collected organic phase was dried over anhydrous sodium sulfate and concentrated under reduced pressure. The crude mixture was purified by silica gel column chromatography (EtOAc: Hexane = 1:2,  $R_f$ : 0.24) to afford the desired compound as a light-yellow solid. **Yield:** 0.50 g, 73%. **Mp:** >390 °C.  **$^1\text{H}$  NMR (500 MHz,  $\text{CDCl}_3$ )  $\delta$  (ppm):** 8.24 (dd,  $J = 7.9, 1.6$  Hz, 2H), 8.19 (d,  $J = 8.6$  Hz, 1H), 8.13 (d,  $J = 8.7$  Hz, 1H), 8.04 (t,  $J = 2.3$  Hz, 2H), 7.64 (dd,  $J = 8.7, 2.1$  Hz, 1H), 7.51 (dd,  $J = 8.6, 2.0$  Hz, 1H), 7.42 (ddd,  $J = 8.8, 7.1, 1.7$  Hz, 2H), 7.32 – 7.29 (m, 2H), 7.22 – 7.14 (m, 2H), 7.01 – 6.92 (m, 4H), 6.73 (dd,  $J = 8.7, 0.9$  Hz, 2H), 6.52 – 6.45 (m, 2H). **NMR (125 MHz,  $\text{CDCl}_3$ )  $\delta$  (ppm):** 143.84, 141.04, 140.89, 136.64, 134.76, 133.34, 132.84, 131.46, 130.76, 129.71, 128.81, 128.24, 127.27, 127.09, 126.99, 123.54, 123.33, 122.81, 122.50, 122.23, 117.70, 117.31. **HR-MS  $[\text{M}+\text{H}]^+$  Calculated:** ( $\text{C}_{34}\text{H}_{22}\text{N}_2\text{O}_2\text{S}_2$ ) 555.1195; **Found:** 555.1195. **Anal. Calcd. for  $\text{C}_{34}\text{H}_{22}\text{N}_2\text{O}_2\text{S}_2$ :** C, 73.62%; H, 4.00%; N, 5.05%. **Found:** C, 73.60%; H, 4.07%; N, 4.72%. Purity: 99.4% (HPLC analysis; retention time: 7.75 minutes in 75% MeCN/25%  $\text{H}_2\text{O}$ ).

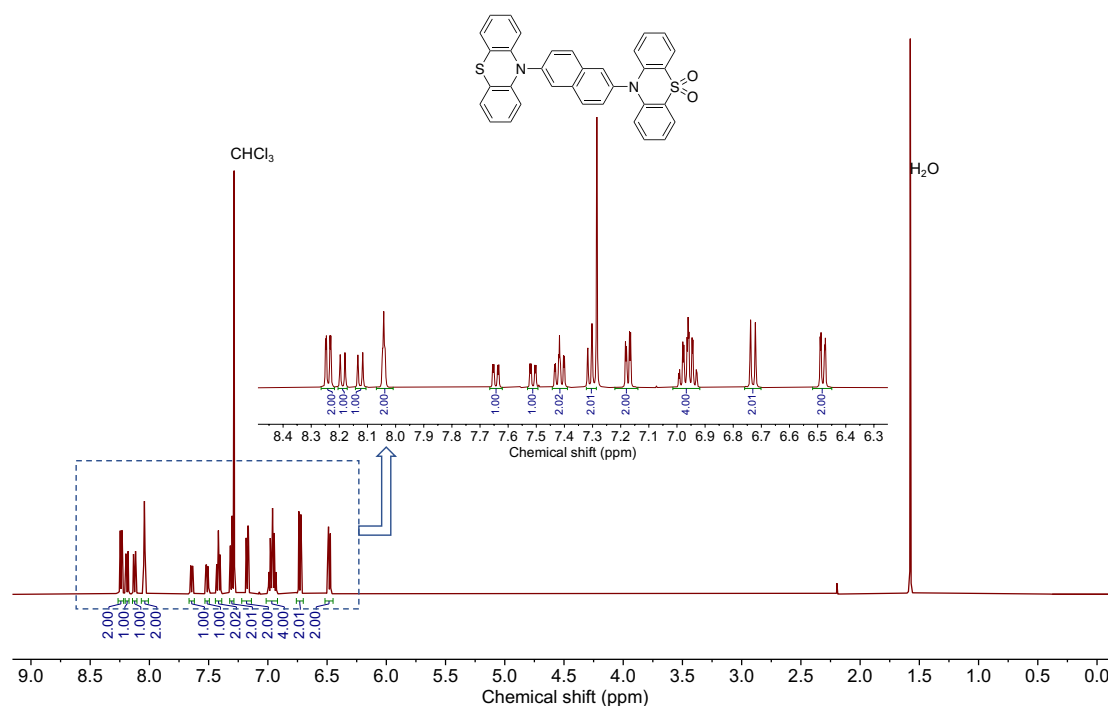

**Figure S9.**  $^1\text{H}$  NMR spectrum of PTZ-Nap in  $\text{CDCl}_3$ .

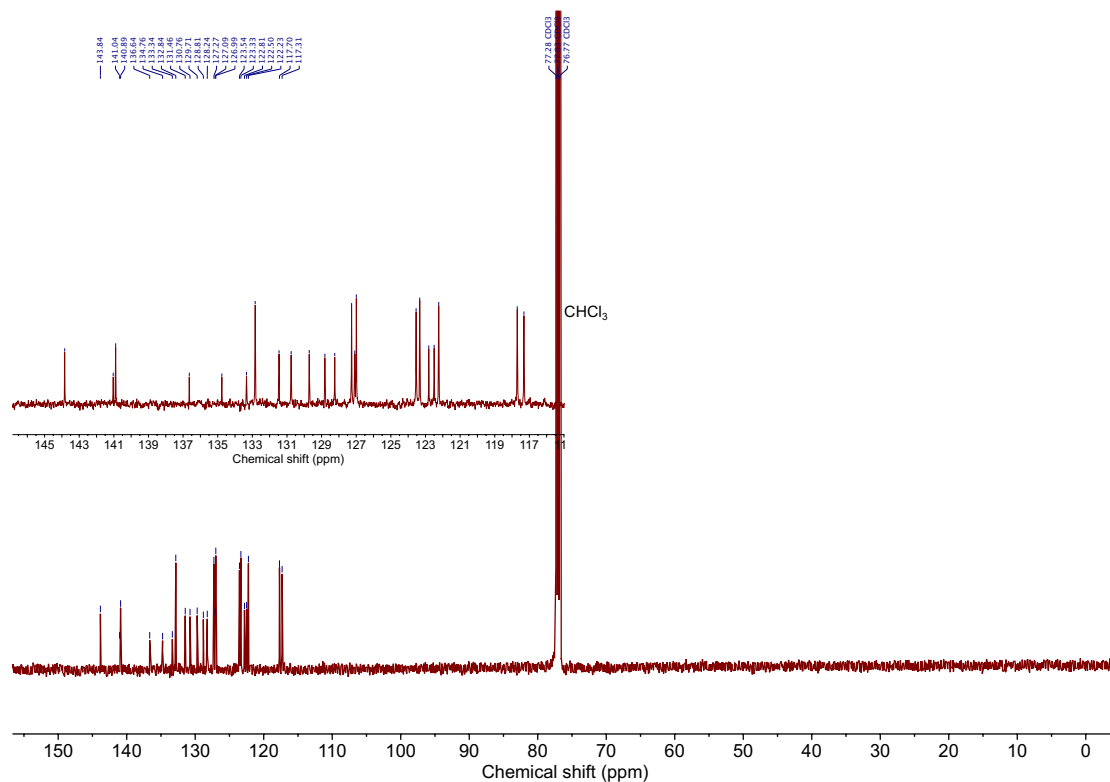

Figure S10. <sup>13</sup>C NMR spectrum of PTZ-Nap in CDCl<sub>3</sub>.

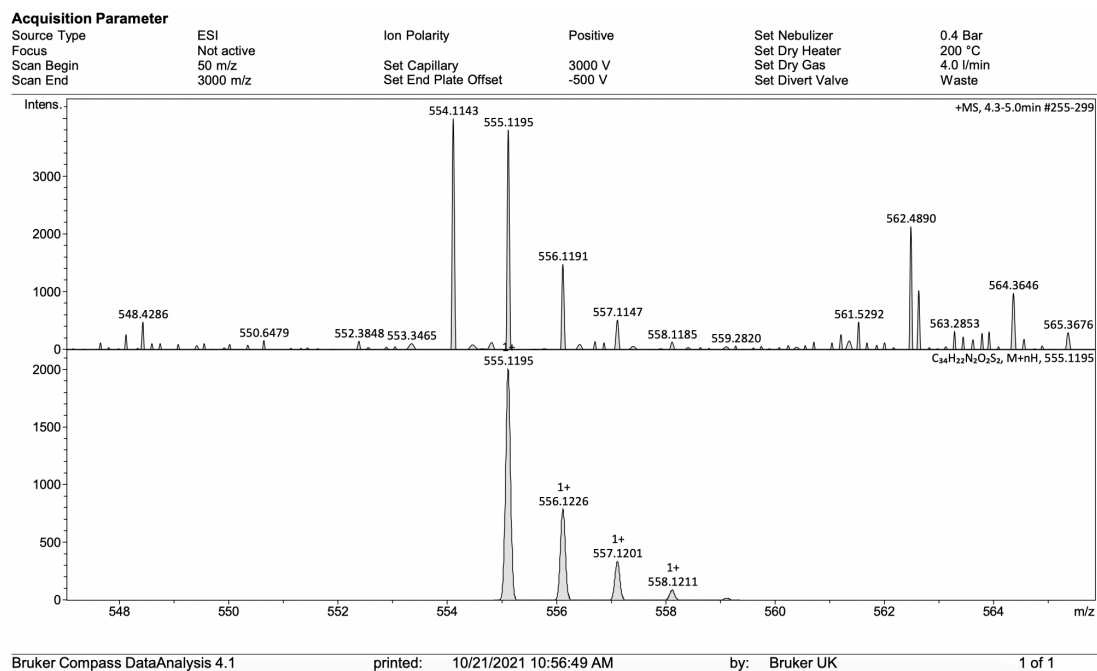

Figure S11. HRMS spectrum of PTZ-Nap.

Analysis type:

Single  Duplicate  Triplicate

Analysis Result:

| Element  | Expected % | Found (1) | Found (2) | Found (3) |
|----------|------------|-----------|-----------|-----------|
| Carbon   | 73.62      | 73.38     | 73.60     |           |
| Hydrogen | 4.00       | 4.05      | 4.07      |           |
| Nitrogen | 5.05       | 4.70      | 4.72      |           |
| Oxygen   |            |           |           |           |

Authorising Signature:

|                |          |
|----------------|----------|
| Date completed | 15.12.21 |
| Signature      | J-PC     |
| comments       |          |

Figure S12. Elemental analysis result of PTZ-Nap.

## HPLC Trace Report04Mar2022

### <Sample Information>

Sample Name : PhT-Nap  
Sample ID :  
Method Filename : 75% Acetonitrile 25 Water 20 mins.lcm  
Batch Filename : PhT-Nap method.lcb  
Vial # : 2-47  
Injection Volume : 10 uL  
Date Acquired : 14/02/2022 18:20:26  
Date Processed : 14/02/2022 18:40:28  
Sample Type : Unknown  
Acquired by : System Administrator  
Processed by : System Administrator

### <Chromatogram>

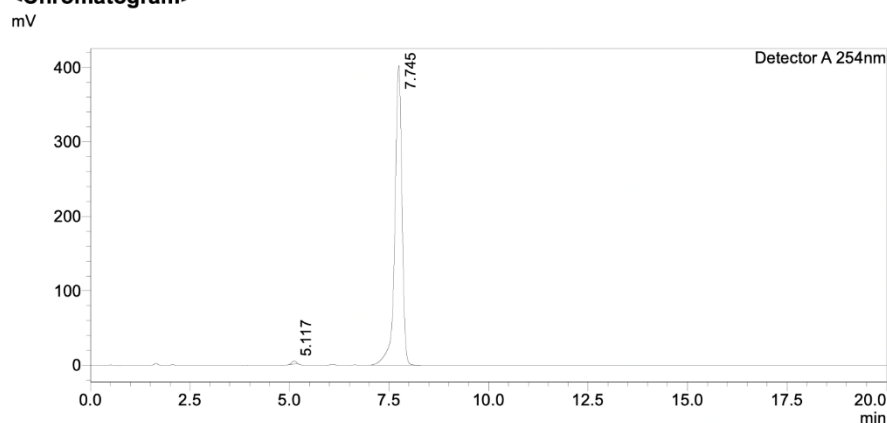

### <Peak Table>

| Peak# | Ret. Time | Area    | Height | Area%   | Area/Height | Width at 5% Height |
|-------|-----------|---------|--------|---------|-------------|--------------------|
| 1     | 5.117     | 30673   | 4168   | 0.606   | 7.359       | 0.209              |
| 2     | 7.745     | 5033444 | 401997 | 99.394  | 12.521      | 0.476              |
| Total |           | 5064117 | 406165 | 100.000 |             |                    |

Figure S13. HPLC trace of PTZ-Nap.



## Photophysical data

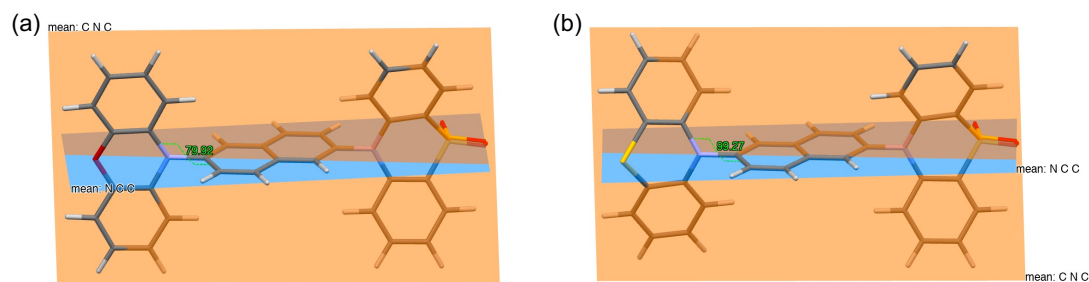

**Figure S14.** Optimized ground state structures of (a) **PXZ-Nap** and (b) **PTZ-Nap** was conducted at the PBE0/6-31G(d,p) level in the gas phase.

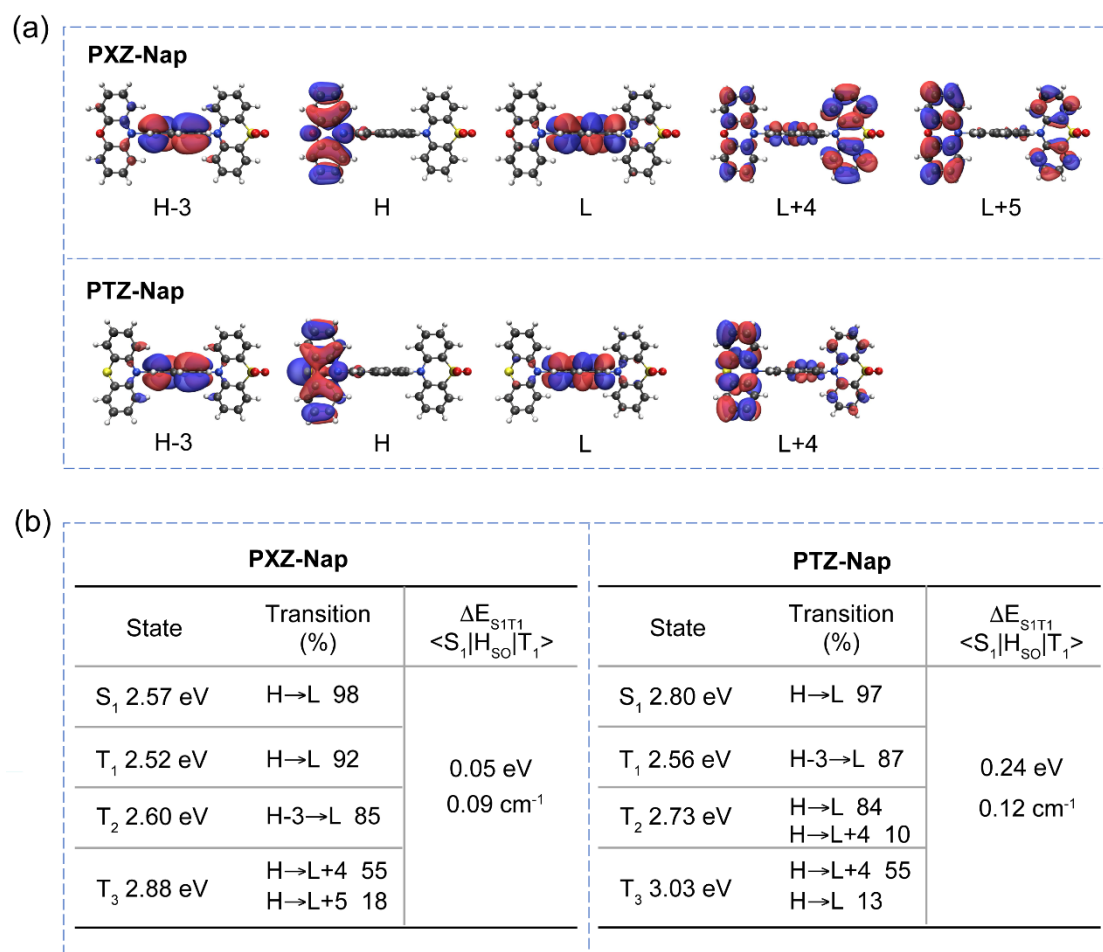

**Figure S15.** (a) Frontier molecular orbitals (isovalue: 0.02) and (b) excited-state information of **PXZ-Nap** and **PTZ-Nap** calculated in the gas phase at the PBE0/6-31G(d,p) level. H and L denote HOMO and LUMO, respectively.

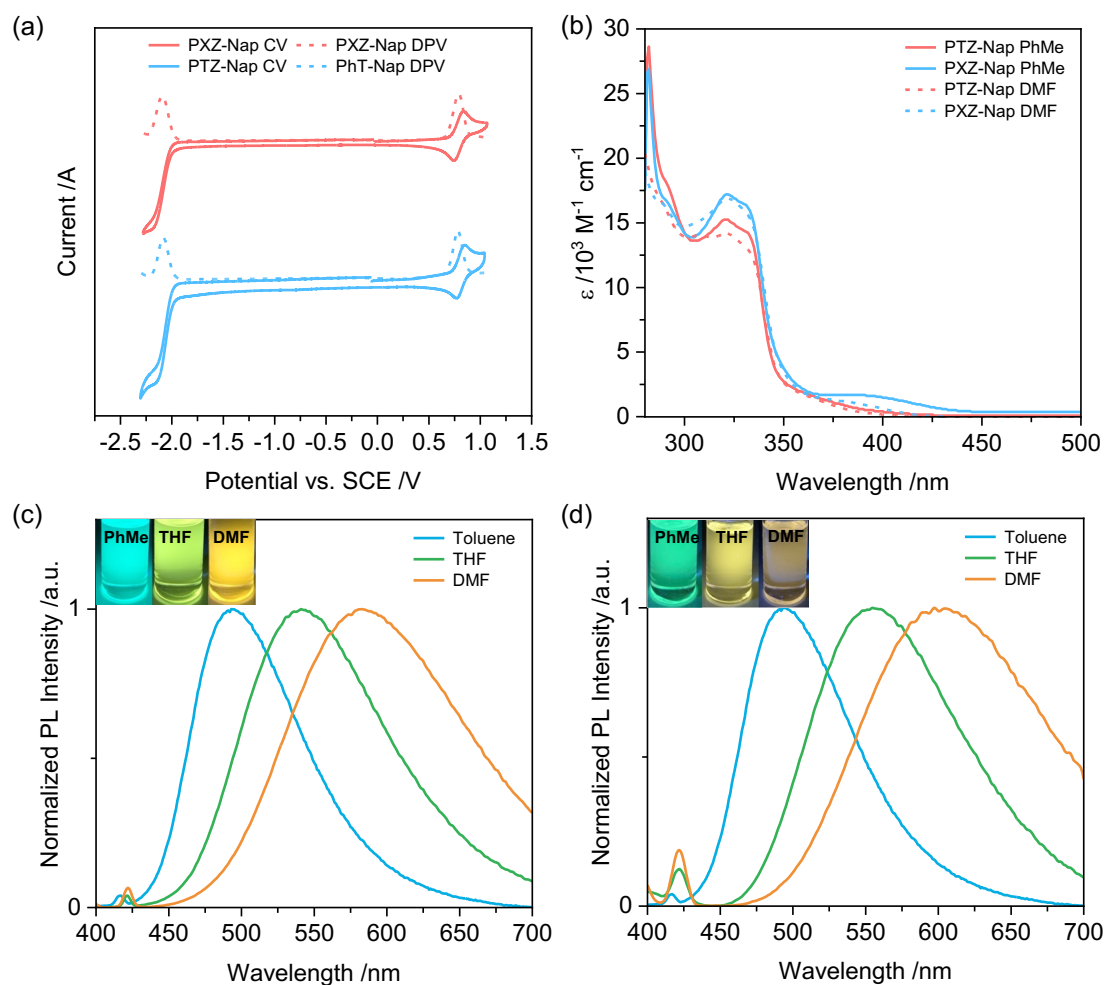

**Figure S16.** (a) Cyclic voltammogram (CV) and differential pulse voltammetry (DPV) in degassed DMF with 0.1 M  $[n\text{Bu}_4\text{N}]\text{PF}_6$  as the supporting electrolyte and  $\text{Fc}/\text{Fc}^+$  as the internal reference (0.45 V vs. SCE).<sup>2</sup>  $E_{\text{HOMO/LUMO}} = -(E^{\text{ox}}/E^{\text{red}} + 4.8)$  eV, using  $\text{Fc}/\text{Fc}^+$  as the internal reference.<sup>3</sup> (b) UV-vis absorption spectra in toluene and DMF at room temperature. Steady-state solvatochromic PL spectra of (c) **PXZ-Nap** and (d) **PTZ-Nap** at room temperature ( $\lambda_{\text{exc}} = 370$  nm); inset: photos of solution samples excited using a UV torch.

**Table S1.** Electrochemical data of **PXZ-Nap** and **PTZ-Nap**.

|                | $E^{\text{ox}} / \text{V}^{\text{a}}$ | $E^{\text{red}} / \text{V}^{\text{a}}$ | HOMO / eV <sup>b</sup> | LUMO / eV <sup>b</sup> |
|----------------|---------------------------------------|----------------------------------------|------------------------|------------------------|
| <b>PXZ-Nap</b> | 0.79                                  | -2.09                                  | -5.14                  | -2.26                  |
| <b>PTZ-Nap</b> | 0.78                                  | -2.09                                  | -5.13                  | -2.26                  |

<sup>a</sup>Potential values were obtained from the DPV peak values in DMF and referenced with respect to SCE ( $\text{Fc}/\text{Fc}^+ = 0.45 \text{ eV}$ ).<sup>2</sup>  $E_{\text{HOMO/LUMO}} = -(E^{\text{ox}}/E^{\text{red}} + 4.8) \text{ eV}$ , using  $\text{Fc}/\text{Fc}^+$  as the internal reference.<sup>3</sup>

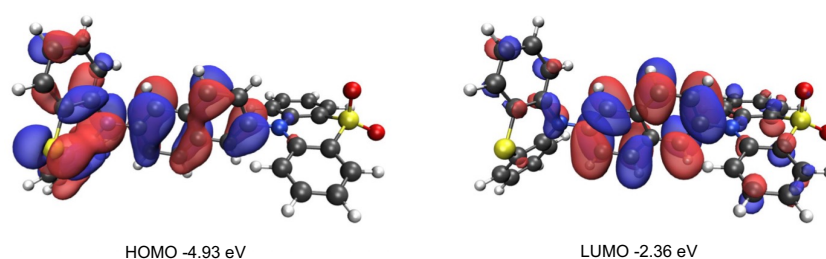

**Figure S17.** Calculated HOMO and LUMO distribution (isovalue: 0.02) of the quasi-axial conformation of **PTZ-Nap** at the PBE0/6-31G(d,p) level in DMF. We can clearly see that HOMO is delocalized on **PTZ** and naphthalene due to the quasi-axial conformation in DMF.

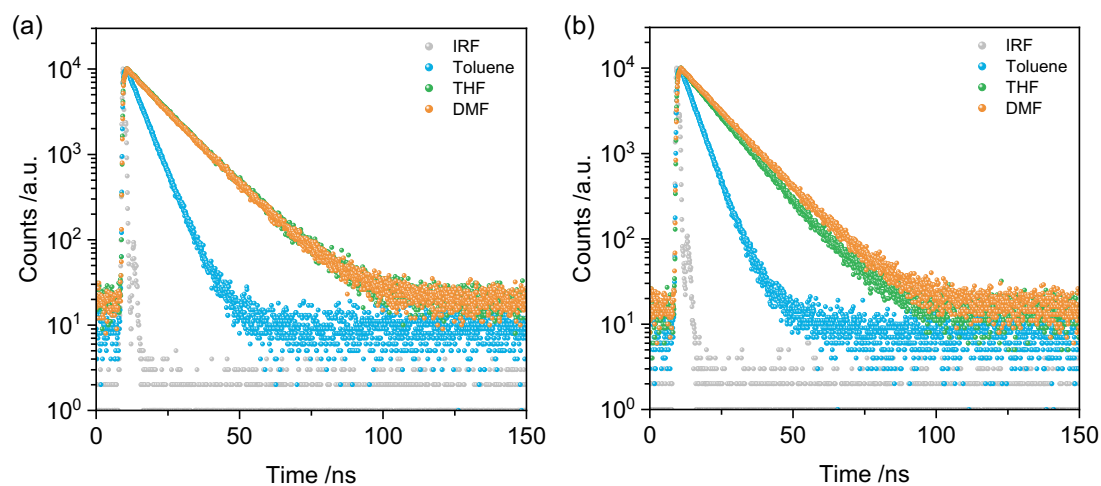

**Figure S18.** Time-resolved PL decay profiles of (a) **PXZ-Nap** and **PTZ-Nap** in various solvents at room temperature ( $\lambda_{\text{exc}} = 379 \text{ nm}$ ).

**Table S2.** Solution-state photophysical data of **PXZ-Nap** and **PTZ-Nap**.

| Solvents | <b>PXZ-Nap</b>                               |                                           |                                    | <b>PTZ-Nap</b>                               |                                           |                                    |
|----------|----------------------------------------------|-------------------------------------------|------------------------------------|----------------------------------------------|-------------------------------------------|------------------------------------|
|          | $\lambda_{\text{PL}} / \text{nm}^{\text{a}}$ | $\tau_{\text{PL}} / \text{ns}^{\text{b}}$ | $\Phi_{\text{PL}}^{\text{c}} / \%$ | $\lambda_{\text{PL}} / \text{nm}^{\text{a}}$ | $\tau_{\text{PL}} / \text{ns}^{\text{b}}$ | $\Phi_{\text{PL}}^{\text{c}} / \%$ |
| Toluene  | 493                                          | 5.01                                      | 7.9                                | 493                                          | 4.55                                      | 3.5                                |
| THF      | 541                                          | 12.39                                     | 4.2                                | 555                                          | 10.02                                     | 2.3                                |
| DMF      | 583                                          | 12.49                                     | 1.3                                | 597                                          | 10.72                                     | 1.1                                |

<sup>a</sup> $\lambda_{\text{exc}} = 370 \text{ nm}$ . <sup>b</sup> $\lambda_{\text{exc}} = 379 \text{ nm}$ . <sup>c</sup> in air.

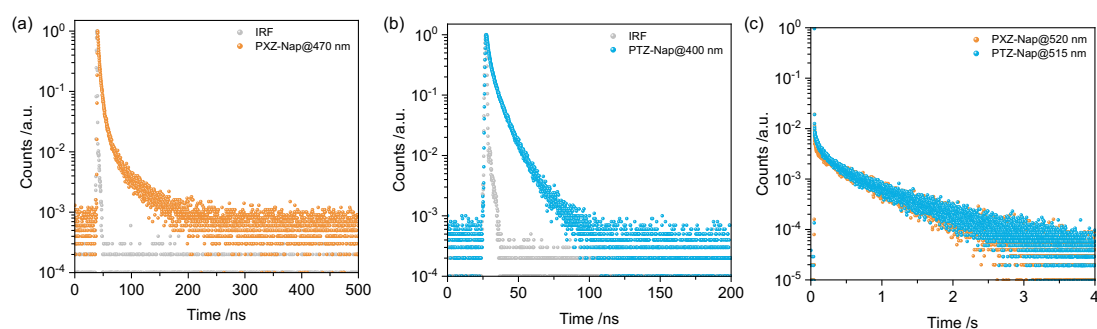

**Figure S19.** Time-resolved PL decay profiles of (a) 1 wt% **PXZ-Nap** and (b) 1 wt% **PTZ-Nap** in PMMA in air at 298 K. (c) Time-resolved PL decay profiles of 1 wt% **PXZ-Nap** and 1 wt% **PTZ-Nap** in PMMA in vacuum at 77 K ( $\lambda_{\text{exc}} = 379 \text{ nm}$ ).

**Table S3.** Photophysical data of **PXZ-Nap** and **PTZ-Nap** (1 wt% and 10 wt%) in PMMA.

|                       | Fluorescence <sup>a</sup>                    |                                           | RTP <sup>b</sup>                             |                                           | LTP <sup>c</sup>                             |                                           | $\Phi_{\text{PL}} / \%$ |                |                                |
|-----------------------|----------------------------------------------|-------------------------------------------|----------------------------------------------|-------------------------------------------|----------------------------------------------|-------------------------------------------|-------------------------|----------------|--------------------------------|
|                       | $\lambda_{\text{PL}} / \text{nm}^{\text{c}}$ | $\tau_{\text{PL}} / \text{ns}^{\text{d}}$ | $\lambda_{\text{PL}} / \text{nm}^{\text{c}}$ | $\tau_{\text{PL}} / \text{ms}^{\text{d}}$ | $\lambda_{\text{PL}} / \text{nm}^{\text{c}}$ | $\tau_{\text{PL}} / \text{ms}^{\text{e}}$ | air                     | N <sub>2</sub> | $\Phi_{\text{RTP}}^{\text{f}}$ |
| 1 wt% <b>PXZ-Nap</b>  | 470                                          | 7.55                                      | 470                                          | 83.3                                      | 520                                          | 584.2                                     | 1.3                     | 1.5            | 0.2                            |
| 10 wt% <b>PXZ-Nap</b> | 495                                          | 7.16                                      | 475                                          | 42.1                                      | 525                                          | 503.9                                     | 2.4                     | 2.9            | 0.5                            |
| 1 wt% <b>PTZ-Nap</b>  | 400                                          | 5.19                                      | 510                                          | 66.7                                      | 515                                          | 628.0                                     | 5.3                     | 5.6            | 0.3                            |
| 10 wt% <b>PTZ-Nap</b> | 400                                          | 5.20                                      | 500                                          | 135.6                                     | 515                                          | 471.2                                     | 3.7                     | 5.8            | 2.1                            |
|                       | 505                                          | 13.06                                     |                                              |                                           |                                              |                                           |                         |                |                                |

<sup>a</sup> Emission in air at 298 K. <sup>b</sup> Emission in vacuum at 298 K. <sup>c</sup> Emission in vacuum at 77 K. <sup>d</sup>  $\lambda_{\text{exc}} = 370 \text{ nm}$ , fluorescence lifetime recorded at emission maximum at 298 K. <sup>e</sup>  $\lambda_{\text{exc}} = 379 \text{ nm}$ , RTP lifetime recorded at emission maximum at 298 K. <sup>f</sup>  $\lambda_{\text{exc}} = 379 \text{ nm}$ , LTP lifetime recorded at emission maximum at 77 K. <sup>f</sup>  $\Phi_{\text{RTP}} = \Phi_{\text{N}_2} - \Phi_{\text{air}}$ .

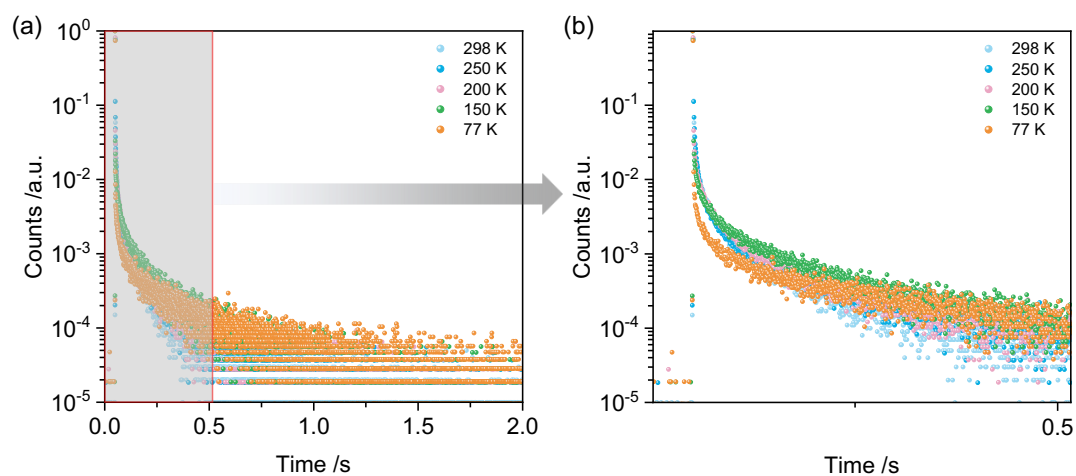

**Figure S20.** (a) Time-resolved phosphorescence decay profiles and (b) locally zoomed time-resolved phosphorescence decay profiles of 1 wt% **PXZ-Nap** in PMMA at different temperatures at 470 nm ( $\lambda_{\text{exc}} = 379$  nm).

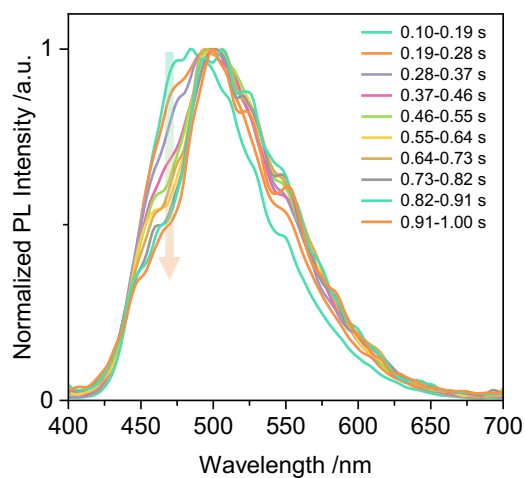

**Figure S21.** Phosphorescence emission spectra of 1 wt% **PXZ-Nap** in PMMA at 200 K at different time-gated windows ( $\lambda_{\text{exc}} = 379$  nm).

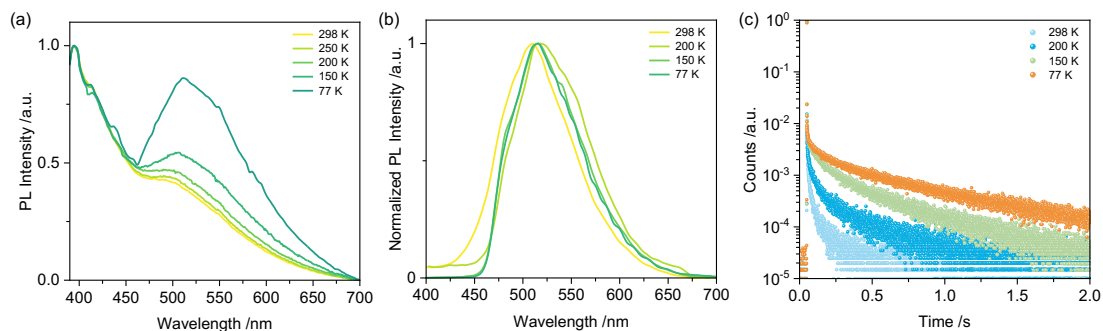

**Figure S22.** (a) Temperature-dependent steady-state emission spectra of 1 wt% **PTZ-Nap** in PMMA (normalized at 395 nm,  $\lambda_{\text{exc}} = 370$  nm). (b) Temperature-dependent phosphorescence emission spectra of 1 wt% **PTZ-Nap** (time-gated window: 10-200 ms for 298 K; 0.1-1 s for 200 K and 150 K; 0.1-1.5 s for 77 K). (c) Temperature-dependent time-resolved phosphorescence decay profiles of 1 wt% **PTZ-Nap** ( $\lambda_{\text{em}} = 510$  nm,  $\lambda_{\text{exc}} = 379$  nm). The gradually prolonged phosphorescence lifetime can only demonstrate the suppression of nonradiative processes as the temperature decreases. It is difficult to distinguish  $T_1^{\text{H}}$  and  $T_1^{\text{L}}$  without observing distinct triplet emission bands.

**Table S4.** Summarized photophysical data of 1 wt% **PXZ-Nap** and 1 wt% **PTZ-Nap** in mCP.

|                         | RTP <sup>a</sup>                |                              | LTP <sup>b</sup>                |                              | T <sub>1</sub> energy <sup>c</sup> |                                 | $\Phi_{\text{PL}}/\%$ |                |
|-------------------------|---------------------------------|------------------------------|---------------------------------|------------------------------|------------------------------------|---------------------------------|-----------------------|----------------|
|                         | $\lambda_{\text{PL}}/\text{nm}$ | $\tau_{\text{PL}}/\text{ms}$ | $\lambda_{\text{PL}}/\text{nm}$ | $\tau_{\text{PL}}/\text{ms}$ | T <sub>1</sub> <sup>H</sup> /eV    | T <sub>1</sub> <sup>L</sup> /eV | air                   | N <sub>2</sub> |
| 1 wt%<br><b>PXZ-Nap</b> | 490                             | 10.04                        | 512                             | 686.21                       | 2.82                               | 2.56                            | 10.8                  | 26.9           |
|                         |                                 |                              | 535                             | 647.21                       |                                    |                                 |                       |                |
| 1 wt%<br><b>PTZ-Nap</b> | 475                             | 20.76                        | 475                             | 1517.84                      | 2.79                               | 2.64                            | 7.7                   | 15.9           |
|                         | 515                             | 24.68                        |                                 |                              |                                    |                                 |                       |                |
|                         | 550                             | 25.43                        |                                 |                              |                                    |                                 |                       |                |

<sup>a</sup> phosphorescence in vacuum at 298 K. <sup>b</sup> phosphorescence in vacuum at 77 K.  $\lambda_{\text{exc}} = 379$  nm. Time-gated windows of RTP and LTP are 10-200 ms and 0.1-2.0 s, respectively. <sup>c</sup> value estimated from the onset of the RTP (T<sub>1</sub><sup>H</sup>) and LTP (T<sub>1</sub><sup>L</sup>) spectra.

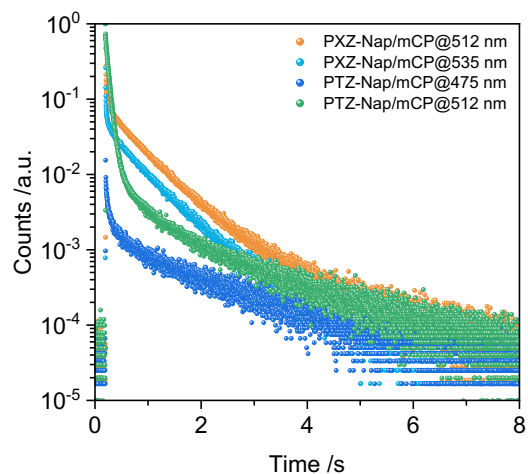

**Figure S23.** Time-resolved phosphorescence decay profiles of 1 wt% **PXZ-Nap** and 1 wt% **PTZ-Nap** in mCP at 77 K ( $\lambda_{\text{exc}} = 379$  nm).

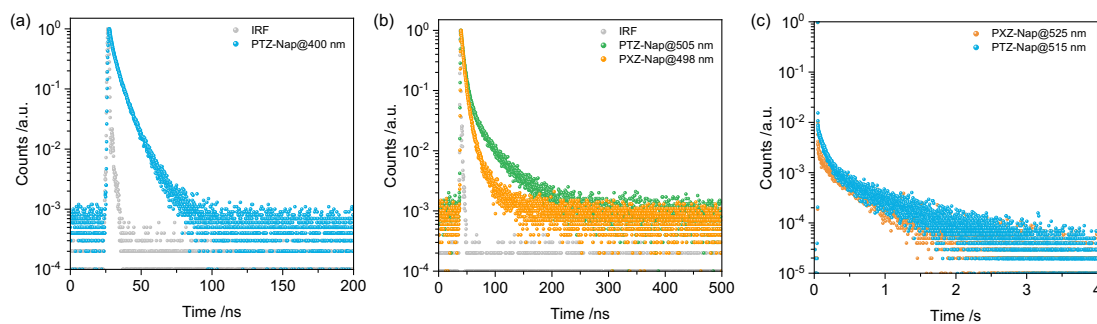

**Figure S24.** Time-resolved PL decay profiles of (a) 10 wt% **PXZ-Nap** and (b) 10 wt% **PTZ-Nap** in PMMA in air at 298 K. (c) Time-resolved phosphorescence decay profiles of 10 wt% **PXZ-Nap** and 10 wt% **PTZ-Nap** in PMMA in vacuum at 77 K ( $\lambda_{\text{exc}} = 379$  nm).

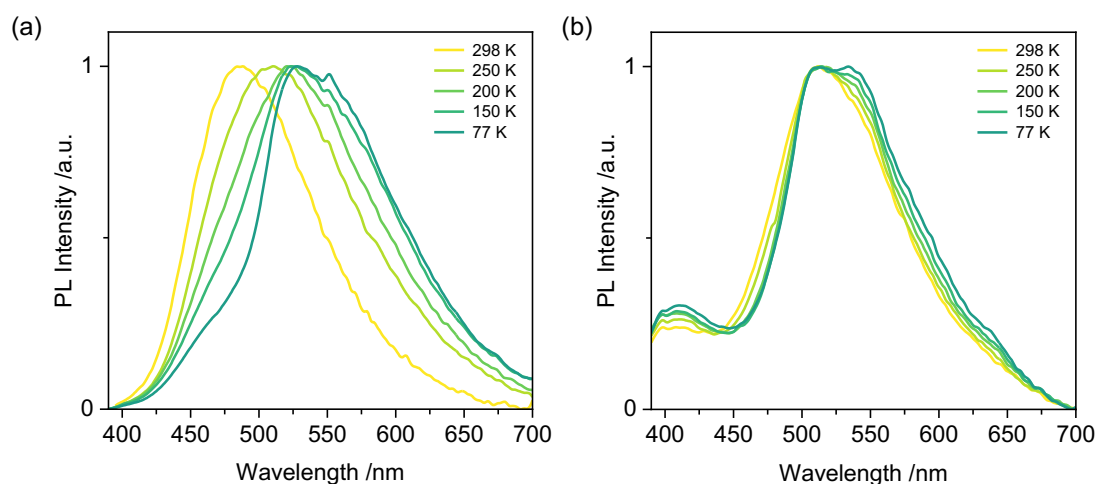

**Figure S25.** Normalized temperature-dependent steady-state emission spectra of (a) 10 wt% **PXZ-Nap** and (b) 10 wt% **PTZ-Nap** in PMMA ( $\lambda_{\text{exc}} = 370$  nm).

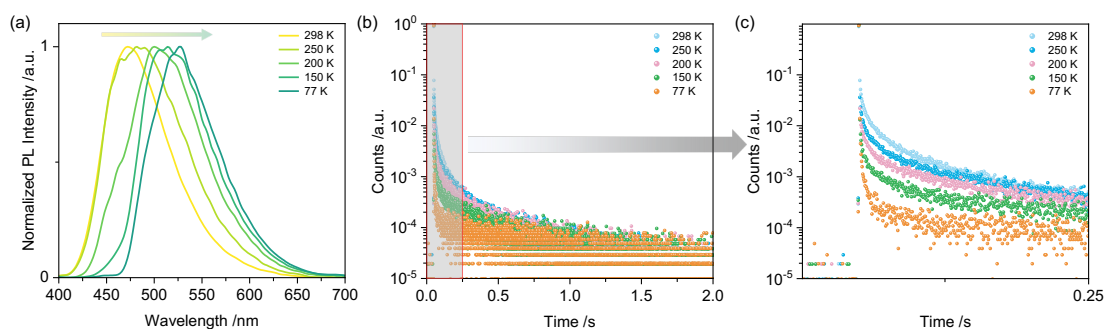

**Figure S26.** (a) Temperature-dependent phosphorescence emission spectra of 10 wt% **PXZ-Nap** in PMMA. (b) Time-resolved phosphorescence decay profiles and (c) locally zoomed temperature-dependent time-resolved phosphorescence decay profiles of 10 wt% **PXZ-Nap** in PMMA ( $\lambda_{\text{em}} = 475$  nm). The shortened lifetime at 475 nm at 77 K is caused by significantly suppressed  $T_1^{\text{H}}$  emission, demonstrated in **Figure S25a**, which is different from TADF.



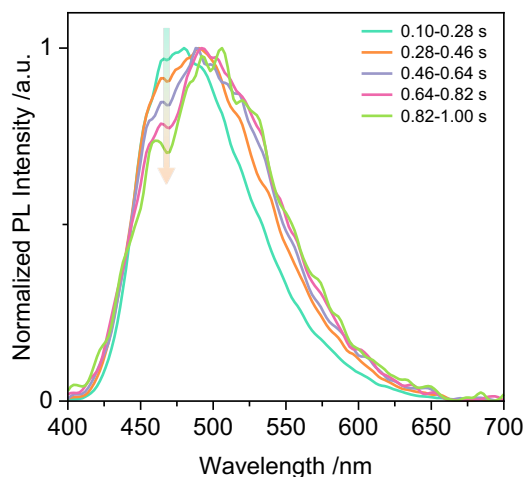

**Figure S27.** Phosphorescence spectra of 10 wt% **PXZ-Nap** in PMMA at 250 K at various time-gated windows ( $\lambda_{\text{exc}} = 379$  nm).

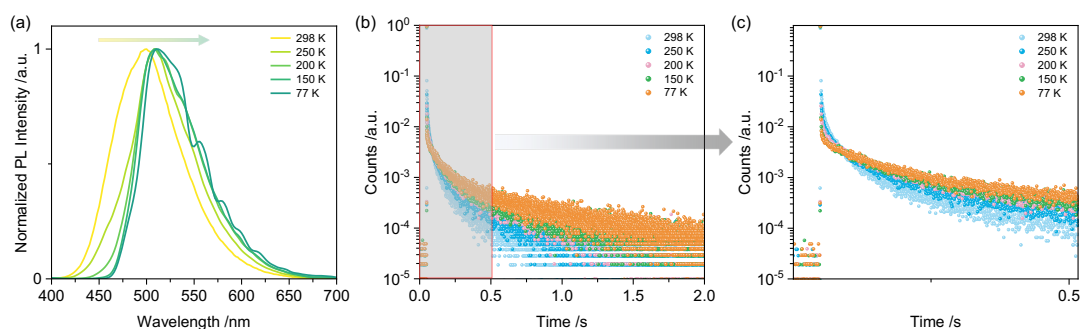

**Figure S28.** (a) Temperature-dependent phosphorescence spectra of 10 wt% **PTZ-Nap** in PMMA. (b) Times-resolved phosphorescence decay profiles and (c) locally zoomed temperature-dependent time-resolved phosphorescence decay profiles of 10 wt% **PXZ-Nap** in PMMA ( $\lambda_{\text{em}} = 500$  nm,  $\lambda_{\text{exc}} = 379$  nm).

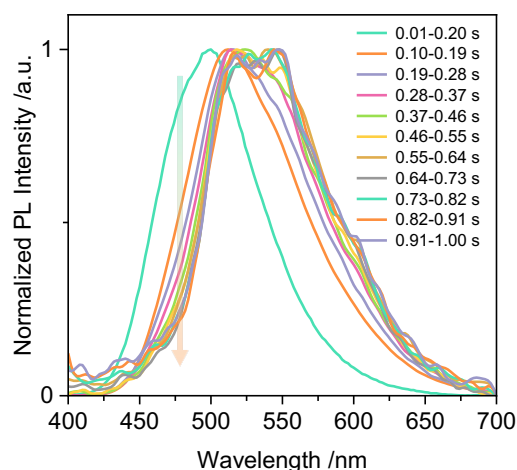

**Figure S29.** Phosphorescence spectra of 10 wt% **PTZ-Nap** in PMMA at 290 K at various time-gated windows ( $\lambda_{\text{exc}} = 379 \text{ nm}$ ).

## References

- (1) Gomurashvili, Z.; Crivello, J. V. Monomeric and polymeric phenothiazine photosensitizers for photoinitiated cationic polymerization. *Macromolecules* **2002**, *35* (8), 2962-2969.
- (2) Connelly, N. G.; Geiger, W. E. Chemical redox agents for organometallic chemistry. *Chem. Rev.* **1996**, *96* (2), 877-910.
- (3) Cardona, C. M.; Li, W.; Kaifer, A. E.; Stockdale, D.; Bazan, G. C. Electrochemical considerations for determining absolute frontier orbital energy levels of conjugated polymers for solar cell applications. *Adv. Mater.* **2011**, *23* (20), 2367-2371.
- (4) Frisch M. J.; Trucks G. W.; Schlegel H. B.; Scuseria G. E.; Robb M. A.; Cheeseman J. R.; Scalmani G.; Barone V.; Petersson G. A.; Nakatsuji H.; Li X.; Caricato M.; Marenich A. V.; Bloino J.; Janesko B. G.; Gomperts R.; Mennucci B.; Hratchian H. P.; Ortiz J. V.; Izmaylov A. F.; Sonnenberg J. L.; Williams-Young D.; Ding F.; Lipparini F.; Egidi F.; Goings J.; Peng B.; Petrone A.; Henderson T.; Ranasinghe D.; Zakrzewski V. G.; Gao J.; Rega N.; Zheng G.; Liang W.; Hada M.; Ehara M.; Toyota K.; Fukuda R.; Hasegawa J.; Ishida M.; Nakajima T.; Honda Y.; Kitao O.; Nakai H.; Vreven T.; Throssell K.; Montgomery J. A., Jr.; Peralta J. E.; Ogliaro F.; Bearpark M. J.; Heyd J. J.; Brothers E. N.; Kudin K. N.; Staroverov V. N.; Keith T. A.; Kobayashi R.; Normand J.; Raghavachari K.; Rendell A. P.; Burant J. C.; Iyengar S. S.; Tomasi J.; Cossi M.; Millam J. M.; Klene M.; Adamo C.; Cammi R.; Ochterski J. W.; Martin R. L.; Morokuma K.; Farkas O.; Foresman J. B.; Fox D. J. Gaussian, Inc., *Gaussian 16 rev. C.01* Wallingford, CT, 2019.
- (5) Adamo, C.; Barone, V. Toward reliable density functional methods without adjustable parameters: The pbe0 model. *J. Chem. Phys.* **1999**, *110* (13), 6158-6170.

- (6) Petersson, G.; Tensfeldt, T. G.; Montgomery Jr, J. A complete basis set model chemistry. Iii. The complete basis set-quadratic configuration interaction family of methods. *J. Chem. Phys.* **1991**, *94* (9), 6091-6101.
- (7) Dennington, R.; Keith, T. A.; Millam, J. M. Gaussview 6.0. 16. *Semichem Inc.: Shawnee Mission, KS, USA* **2016**.
- (8) Gao, X.; Bai, S.; Fazzi, D.; Niehaus, T.; Barbatti, M.; Thiel, W. Evaluation of spin-orbit couplings with linear-response time-dependent density functional methods. *J. Chem. Theory Comput.* **2017**, *13* (2), 515-524.
- (9) Crosby, G. A.; Demas, J. N. Measurement of photoluminescence quantum yields. Review. *J. Phys. Chem.* **1971**, *75* (8), 991-1024.
- (10) Melhuish, W. H. Quantum efficiencies of fluorescence of organic substances: Effect of solvent and concentration of the fluorescent solute<sup>1</sup>. *J. Phys. Chem.* **1961**, *65* (2), 229-235.
- (11) Hong, J.-S.; Shin, C.-J.; Kim, T.-H.; Kim, K.-S. Triphenylene-based compound as an electroluminescent material and others for organic electro-luminescence device. WO2011081449, 2011.
